# Supplementary material
Source: Springer Nature journal article supplement (https://www.springermedizin.de/resource/supplementary/12935_2010_248_MOESM4_ESM.pdf/9540142)

**Control**

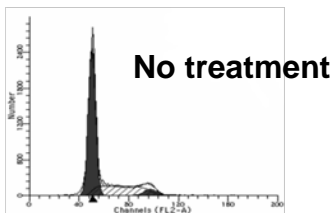

**Time after irradiation**

**ES**

**4Gy**

**ES+4Gy**

**12h**

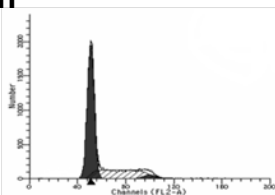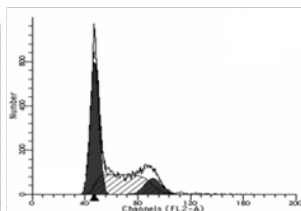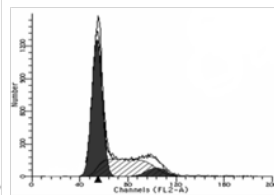

**24h**

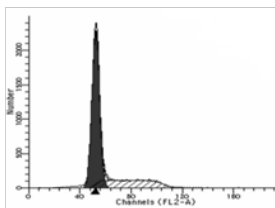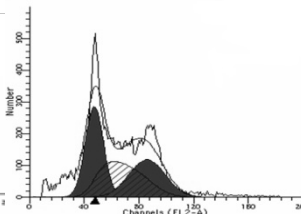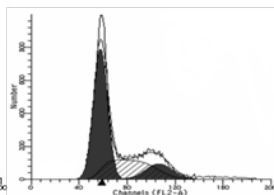

**48h**

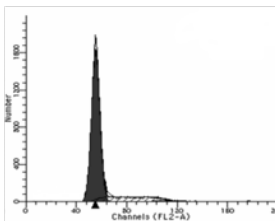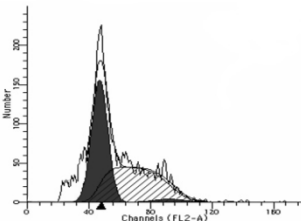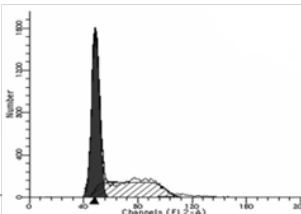

Supplement: MOESM4 [file 9540142]
